# Supplementary material for: Disparities of Perceptions and Practices Related to Cervical Cancer Prevention and the Acceptability of HPV Vaccination According to Educational Level in a French Cross-Sectional Survey of 18–65 Years Old Women
Source: PLoS One. 2014 Oct 10;9(10):e109320. doi: 10.1371/journal.pone.0109320 (PMC4193774; doi:10.1371/journal.pone.0109320)
Supplement: Figure S1 — HPVFEM Questionnaire. The questionnaire was given by the general practitioner to the included women. It was a self-administered questionnaire, anonymously filed by the women. (PDF) [file pone.0109320.s001.pdf]

F

E

M

M

E

S

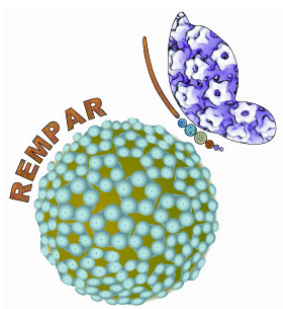

# QUESTIONNAIRE

## PROGRAMME REMPLIR

- A quelle date remplissez-vous ce questionnaire ? ..... / /
- Quel est votre âge ? .....  ans
- Quel est le code postal de votre domicile ? .....

- Quel est votre état civil ? ..... ☐ Mariée Vie maritale ☐ Célibataire ☐ Divorcée ☐ Veuve

- Quelle est votre situation professionnelle actuelle ? *☞ Cochez une seule réponse*

| Salariée<br>Trav. indépendante | Lycéenne<br>Étudiante    | Au chômage               | Sans profession<br>Mère au foyer | Retraitée                | En invalidité            |
|--------------------------------|--------------------------|--------------------------|----------------------------------|--------------------------|--------------------------|
| <input type="checkbox"/>       | <input type="checkbox"/> | <input type="checkbox"/> | <input type="checkbox"/>         | <input type="checkbox"/> | <input type="checkbox"/> |

- Quel est ou quel a été votre dernier emploi ?

| Agriculteur              | Artisan<br>Commerçant<br>Chef d'entreprise | Cadre                    | Technicien<br>Agent de maîtrise | Employé                  | Ouvrier                  |
|--------------------------|--------------------------------------------|--------------------------|---------------------------------|--------------------------|--------------------------|
| <input type="checkbox"/> | <input type="checkbox"/>                   | <input type="checkbox"/> | <input type="checkbox"/>        | <input type="checkbox"/> | <input type="checkbox"/> |

- Si vous n'êtes pas lycéenne/étudiante, quand avez-vous arrêté vos études ?

| Arrêt avant 14 ans       | Arrêt avant le Bac       | Bac à Bac + 2            | Bac + 3 à Bac + 4        | Bac + 5 et plus          |
|--------------------------|--------------------------|--------------------------|--------------------------|--------------------------|
| <input type="checkbox"/> |

- Etes-vous bénéficiaire : ..... ☐ de la CMU ☐ du RMI ☐ Aucun des 2

## *Vous, vos enfants et la vaccination*

- Avez-vous eu les vaccins suivants ? *☞ Cochez une seule réponse pour chaque vaccin*

| Vaccins obligatoires<br>(BCG - DTPolio)                                                            | Rougeole - Oreillons - Rubéole<br>(ROR)                                                            | Hépatite B                                                                                         |
|----------------------------------------------------------------------------------------------------|----------------------------------------------------------------------------------------------------|----------------------------------------------------------------------------------------------------|
| <input type="checkbox"/> Oui <input type="checkbox"/> Non <input type="checkbox"/> Je ne sais plus | <input type="checkbox"/> Oui <input type="checkbox"/> Non <input type="checkbox"/> Je ne sais plus | <input type="checkbox"/> Oui <input type="checkbox"/> Non <input type="checkbox"/> Je ne sais plus |

- Avez-vous des enfants ? ..... ☐ Oui ☐ Non

☞ SI OUI :

- Décrivez votre famille :

|                                                             | Enfant<br>①          | Enfant<br>②          | Enfant<br>③          | Enfant<br>④          | Enfant<br>⑤          | Enfant<br>⑥          | Enfant<br>⑦          | Enfant<br>⑧          |
|-------------------------------------------------------------|----------------------|----------------------|----------------------|----------------------|----------------------|----------------------|----------------------|----------------------|
| <b>Sexe</b><br>☞ <i>Ecrivez F pour Fille, G pour Garçon</i> | <input type="text"/> |
| <b>Age</b>                                                  | <input type="text"/> |

- D'une manière générale, quels vaccins vos enfants ont-ils eu ? ☞ *Cochez les vaccins réalisés*

| Vaccins obligatoires<br>(BCG - DTPolio) | Rougeole<br>Oreillons<br>Rubéole | Pneumocoque              | Papillomavirus           | Varicelle                | Rotavirus<br>(gastro-entérite) |
|-----------------------------------------|----------------------------------|--------------------------|--------------------------|--------------------------|--------------------------------|
| <input type="checkbox"/>                | <input type="checkbox"/>         | <input type="checkbox"/> | <input type="checkbox"/> | <input type="checkbox"/> | <input type="checkbox"/>       |

- Ont-ils été vaccinés contre l'hépatite B ? .....
 

|                          |                          |                                    |
|--------------------------|--------------------------|------------------------------------|
| Tous                     | Certains                 | Aucun                              |
| <input type="checkbox"/> | <input type="checkbox"/> | <input type="checkbox"/>           |
|                          | Avant 5 ans              | A l'adolescence/<br>A l'âge adulte |
|                          | <input type="checkbox"/> | <input type="checkbox"/>           |
- Ceux qui ont été vaccinés, l'ont-ils été plutôt :

## Vous et votre suivi médical

- Suivez-vous actuellement un traitement ? .....
 

|                          |                          |                          |
|--------------------------|--------------------------|--------------------------|
| Oui                      | Je vais le commencer     | Non                      |
| <input type="checkbox"/> | <input type="checkbox"/> | <input type="checkbox"/> |

☞ **SI OUI :**

- Lequel ? \_\_\_\_\_

|                                 |                      |                      |
|---------------------------------|----------------------|----------------------|
| NE RIEN INSCRIRE DANS CES CASES |                      |                      |
| <input type="text"/>            | <input type="text"/> | <input type="text"/> |

- Pour quelle raison ? \_\_\_\_\_

|                                 |                      |                      |
|---------------------------------|----------------------|----------------------|
| NE RIEN INSCRIRE DANS CES CASES |                      |                      |
| <input type="text"/>            | <input type="text"/> | <input type="text"/> |

- Avez-vous eu des mammographies dans le cadre du dépistage du cancer du sein ? ☞ *Cochez une seule réponse*

| Oui, avec prescription de mon médecin | Oui, à la suite d'un courrier reçu pour un dépistage gratuit | Non                      | Pas encore               |
|---------------------------------------|--------------------------------------------------------------|--------------------------|--------------------------|
| <input type="checkbox"/>              | <input type="checkbox"/>                                     | <input type="checkbox"/> | <input type="checkbox"/> |

- Avez-vous eu une aide à l'arrêt du tabac ? ☞ *Si vous n'avez jamais fumé, cochez la case correspondante*

| Je n'ai jamais fumé      | Non car j'ai arrêté de moi-même | Oui et j'ai arrêté de fumer | Oui mais je n'ai pas arrêté de fumer | Non pas pour l'instant   | Non mais je ne souhaite pas arrêter |
|--------------------------|---------------------------------|-----------------------------|--------------------------------------|--------------------------|-------------------------------------|
| <input type="checkbox"/> | <input type="checkbox"/>        | <input type="checkbox"/>    | <input type="checkbox"/>             | <input type="checkbox"/> | <input type="checkbox"/>            |

## Vous et votre suivi gynécologique

- Avez-vous déjà eu les interventions gynécologiques suivantes ?
 

|                          |                               |                             |                          |
|--------------------------|-------------------------------|-----------------------------|--------------------------|
| Laser du col de l'utérus | Conisation du col de l'utérus | Ablation totale de l'utérus | Aucune des 3             |
| <input type="checkbox"/> | <input type="checkbox"/>      | <input type="checkbox"/>    | <input type="checkbox"/> |

☞ Cochez la ou les cases correspondantes

☞ SI OUI :

- Pour quelle(s) raison(s) ? \_\_\_\_\_

| NE RIEN INSCRIRE DANS CES CASES |                          |                          |
|---------------------------------|--------------------------|--------------------------|
| <input type="checkbox"/>        | <input type="checkbox"/> | <input type="checkbox"/> |

- En quelle(s) année(s) ? .....

- Avez-vous eu un traitement par médicaments pour une maladie gynécologique transmissible ? ...  
Oui ☐ Non ☐

☞ SI OUI :

- Pour quelle(s) maladie(s) ? \_\_\_\_\_

| NE RIEN INSCRIRE DANS CES CASES |                          |                          |
|---------------------------------|--------------------------|--------------------------|
| <input type="checkbox"/>        | <input type="checkbox"/> | <input type="checkbox"/> |

- Quelle méthode de contraception avez-vous déjà utilisée ? ☞ Cochez une ou plusieurs réponses

| Je n'ai jamais utilisé de contraception | Préservatifs             | Pilule contraceptive     | Stérilet                 | Autres méthodes          |
|-----------------------------------------|--------------------------|--------------------------|--------------------------|--------------------------|
| <input type="checkbox"/>                | <input type="checkbox"/> | <input type="checkbox"/> | <input type="checkbox"/> | <input type="checkbox"/> |

🔴

Age de début

- En dehors de tout problème de santé, avez-vous un suivi gynécologique ? ☞ Cochez une seule réponse  
Au moins 1 fois par an ☐ Tous les 2-3 ans ☐ Rarement ☐ Jamais ☐

- Quand avez-vous fait pour la dernière fois un frottis ? ☞ Cochez une seule réponse

| Il y a environ 1 an      | Entre 2 à 3 ans          | Il y a plus de 3 ans     | Je n'en ai jamais fait   | Je ne sais pas/plus      |
|--------------------------|--------------------------|--------------------------|--------------------------|--------------------------|
| <input type="checkbox"/> |

- Quel médecin a fait ce dernier frottis ? ☞ Cochez une seule réponse  
.....  
Généraliste ☐ Gynécologue ☐  
Autre ☐ \_\_\_\_\_

- Avez-vous déjà eu un frottis anormal ? ☞ Cochez une seule réponse  
Oui, une fois ☐ Oui, plus d'une fois ☐ Non ☐ Je ne sais pas/plus ☐

☞ SI OUI :

- En quelle année la première fois ? .....

- Avez-vous été re-contactée par votre médecin après un frottis anormal ? .....  
Oui ☐ Non ☐

☞ SI OUI :

- Pourquoi ? \_\_\_\_\_

| NE RIEN INSCRIRE DANS CES CASES |                          |                          |
|---------------------------------|--------------------------|--------------------------|
| <input type="checkbox"/>        | <input type="checkbox"/> | <input type="checkbox"/> |

## Les informations que vous avez sur le cancer du col de l'utérus et ses moyens de prévention

- Le rôle du frottis est : ☞ *Cochez une seule réponse*

| De surveiller les ovaires et le col de l'utérus | De prévenir tous les cancers gynécologiques | De prévenir le cancer du col de l'utérus | Je n'ai pas d'informations |
|-------------------------------------------------|---------------------------------------------|------------------------------------------|----------------------------|
| <input type="checkbox"/>                        | <input type="checkbox"/>                    | <input type="checkbox"/>                 | <input type="checkbox"/>   |

- Il faut faire un frottis : ☞ *Cochez une seule réponse*

| Tous les ans             | Tous les 2-3 ans         | De temps en temps        | Une fois et ça suffit    | Je n'ai pas d'informations |
|--------------------------|--------------------------|--------------------------|--------------------------|----------------------------|
| <input type="checkbox"/>   |

- Il faut faire un frottis : ☞ *Cochez une seule réponse*

| Toute la vie adulte (> 20 ans) | Seulement jusqu'à la ménopause | Seulement après la ménopause | Je n'ai pas d'informations |
|--------------------------------|--------------------------------|------------------------------|----------------------------|
| <input type="checkbox"/>       | <input type="checkbox"/>       | <input type="checkbox"/>     | <input type="checkbox"/>   |

- Avez-vous entendu parler de la cause du cancer du col de l'utérus ? ..... Oui ☐ Non ☐

☞ **SI OUI :**

- Quelle est sa cause ? \_\_\_\_\_

| NE RIEN INSCRIRE DANS CES CASES |                      |                      |
|---------------------------------|----------------------|----------------------|
| <input type="text"/>            | <input type="text"/> | <input type="text"/> |

- Avez-vous entendu parler du vaccin contre le cancer du col de l'utérus ? ..... Oui ☐ Non ☐

☞ **SI OUI :**

- Quand la première fois ? ..... mois  année

- Comment avez-vous eu ces informations ? ☞ *Cochez une ou plusieurs réponses*

| Par mon médecin          | Par un autre professionnel de santé (pharmacien, etc.) | Par mon entourage        | A la télévision          | A la radio Dans la presse écrite Sur Internet | Autre                          |
|--------------------------|--------------------------------------------------------|--------------------------|--------------------------|-----------------------------------------------|--------------------------------|
| <input type="checkbox"/> | <input type="checkbox"/>                               | <input type="checkbox"/> | <input type="checkbox"/> | <input type="checkbox"/>                      | <input type="checkbox"/> _____ |

Et avec ces informations, vous pouvez dire :

- Qui est concerné par ce vaccin : \_\_\_\_\_

| NE RIEN INSCRIRE DANS CES CASES |                      |                      |
|---------------------------------|----------------------|----------------------|
| <input type="text"/>            | <input type="text"/> | <input type="text"/> |

- A quel âge il est conseillé de se faire vacciner : \_\_\_\_\_

| NE RIEN INSCRIRE DANS CES CASES |                      |                      |
|---------------------------------|----------------------|----------------------|
| <input type="text"/>            | <input type="text"/> | <input type="text"/> |

- Qui doit faire des frottis après la vaccination : \_\_\_\_\_

NE RIEN INSCRIRE DANS CES CASES

|  |  |  |
|--|--|--|
|  |  |  |
|--|--|--|

## *A propos de cette vaccination contre le cancer du col de l'utérus*

- Pour votre fille (vos filles), si vous en avez, quel que soit son(leur) âge : ➡ *Cochez une seule réponse*

| Je vais m'informer<br>et y réfléchir | Je préfère attendre      | Elle est (elles sont)<br>déjà vaccinée(s) | J'ai décidé<br>de faire vacciner<br>ma fille (mes filles) | Je vaccinerai<br>ma fille (mes filles)<br>si elle(s) me le<br>demande(nt) | Je pense<br>que cette<br>vaccination<br>est inutile |
|--------------------------------------|--------------------------|-------------------------------------------|-----------------------------------------------------------|---------------------------------------------------------------------------|-----------------------------------------------------|
| <input type="checkbox"/>             | <input type="checkbox"/> | <input type="checkbox"/>                  | <input type="checkbox"/>                                  | <input type="checkbox"/>                                                  | <input type="checkbox"/>                            |

➡ **QUELLE QUE SOIT VOTRE REPONSE :**

- Dîtes pourquoi : \_\_\_\_\_  
\_\_\_\_\_  
\_\_\_\_\_  
\_\_\_\_\_

NE RIEN INSCRIRE DANS CES CASES

|  |  |  |
|--|--|--|
|  |  |  |
|--|--|--|

**Une fois renseigné, glissez votre questionnaire dans l'enveloppe.**

**Remettez-la à la secrétaire de votre médecin ou dans la boîte du cabinet médical.**

Nous vous remercions de votre participation à cette étude  
qui contribuera à faire progresser la prise en charge du cancer du col de l'utérus.  
Si vous souhaitez des informations, vous pouvez nous contactez au 04.78.78.27.45.
